# Supplementary material for: Contaminants of emerging concern in tributaries to the Laurentian Great Lakes: I. Patterns of occurrence
Source: PubMed Central journal article supplement (PMC5617142; doi:10.1371/journal.pone.0182868), 2017-09-27
Supplement: pone.0182868.s007.pdf [file pone.0182868.s007.pdf]

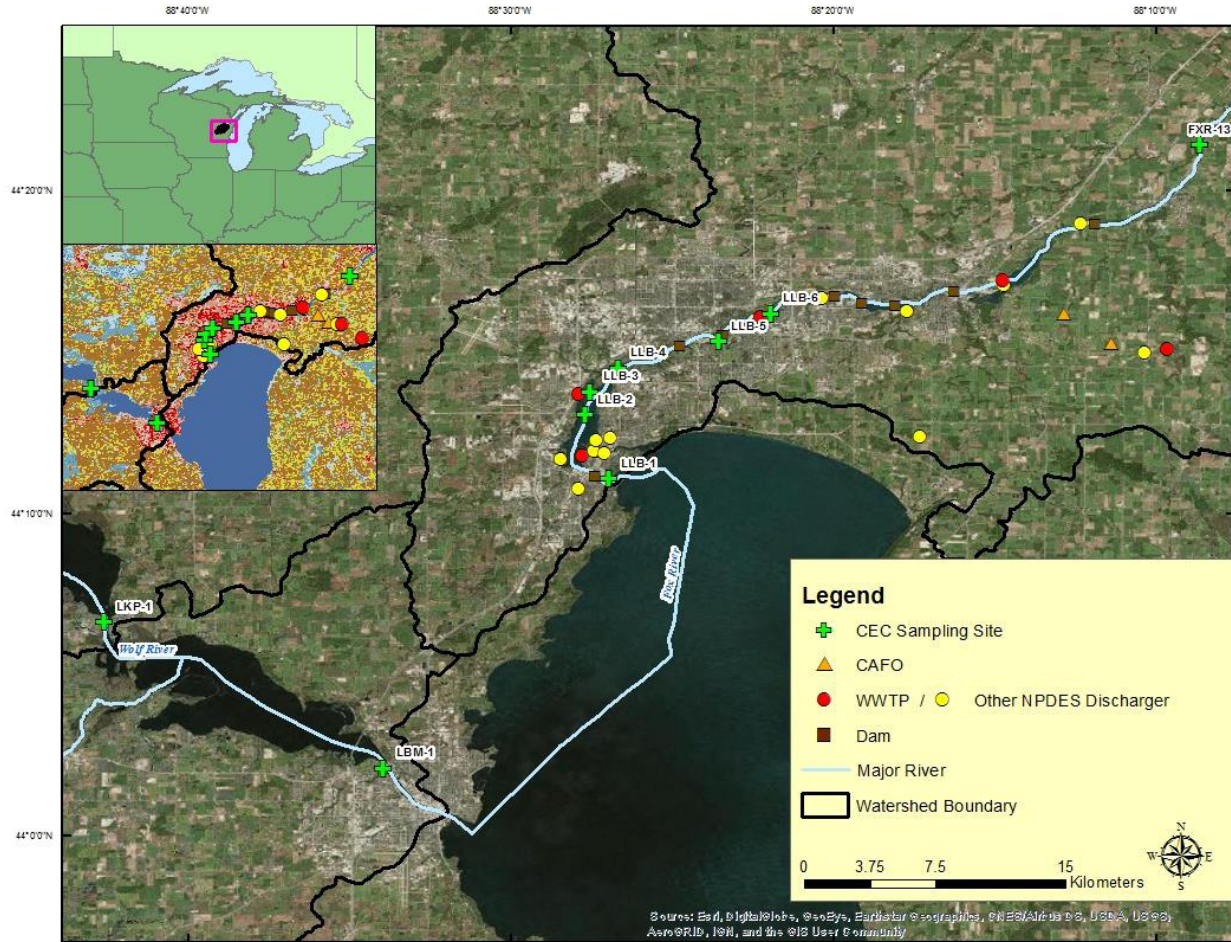

**Fig A.** Map of Fox River sites sampled for contaminants of emerging concern, 2013-14. River flows northeast.

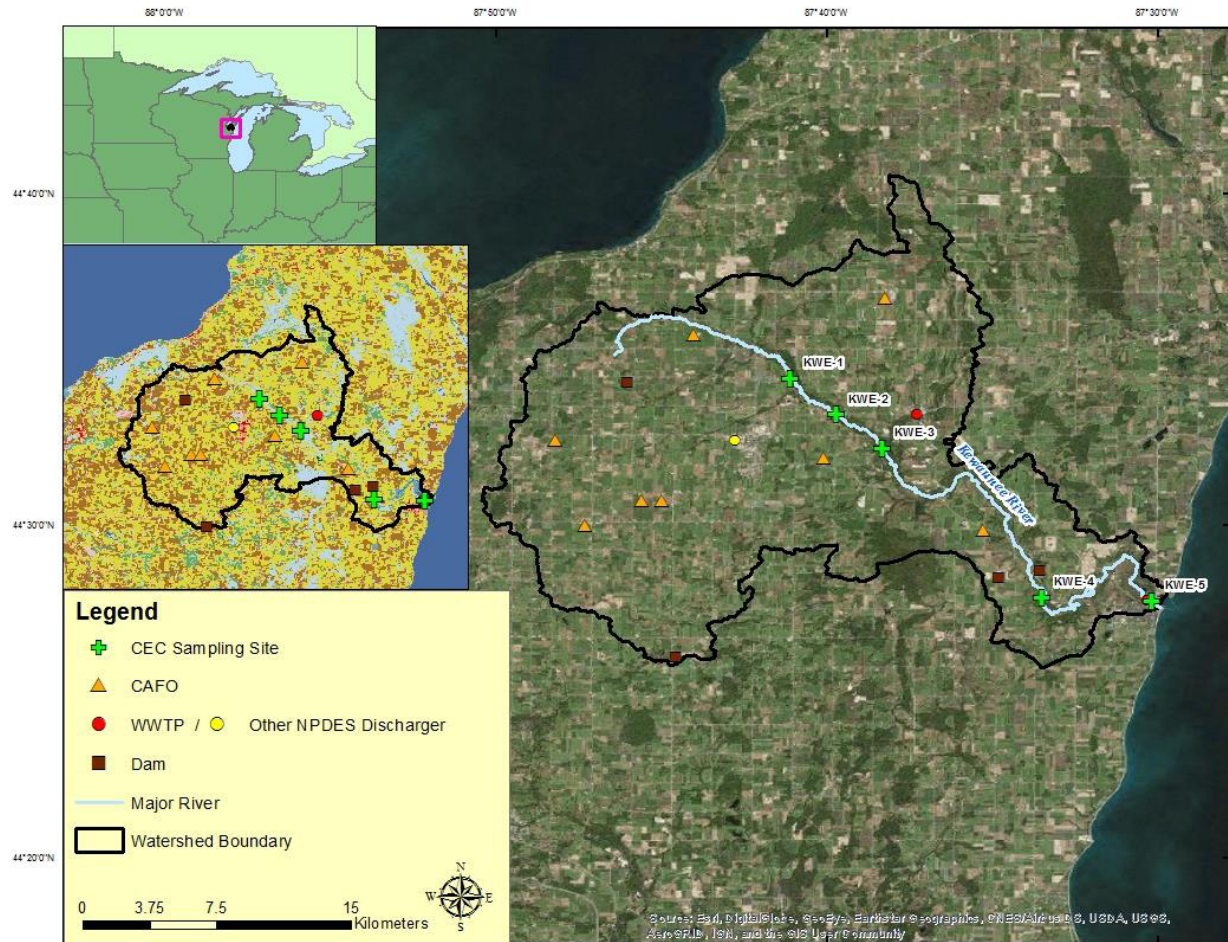

**Fig B.** Map of Kewaunee River sites sampled for contaminants of emerging concern, 2013-14. River flows east.



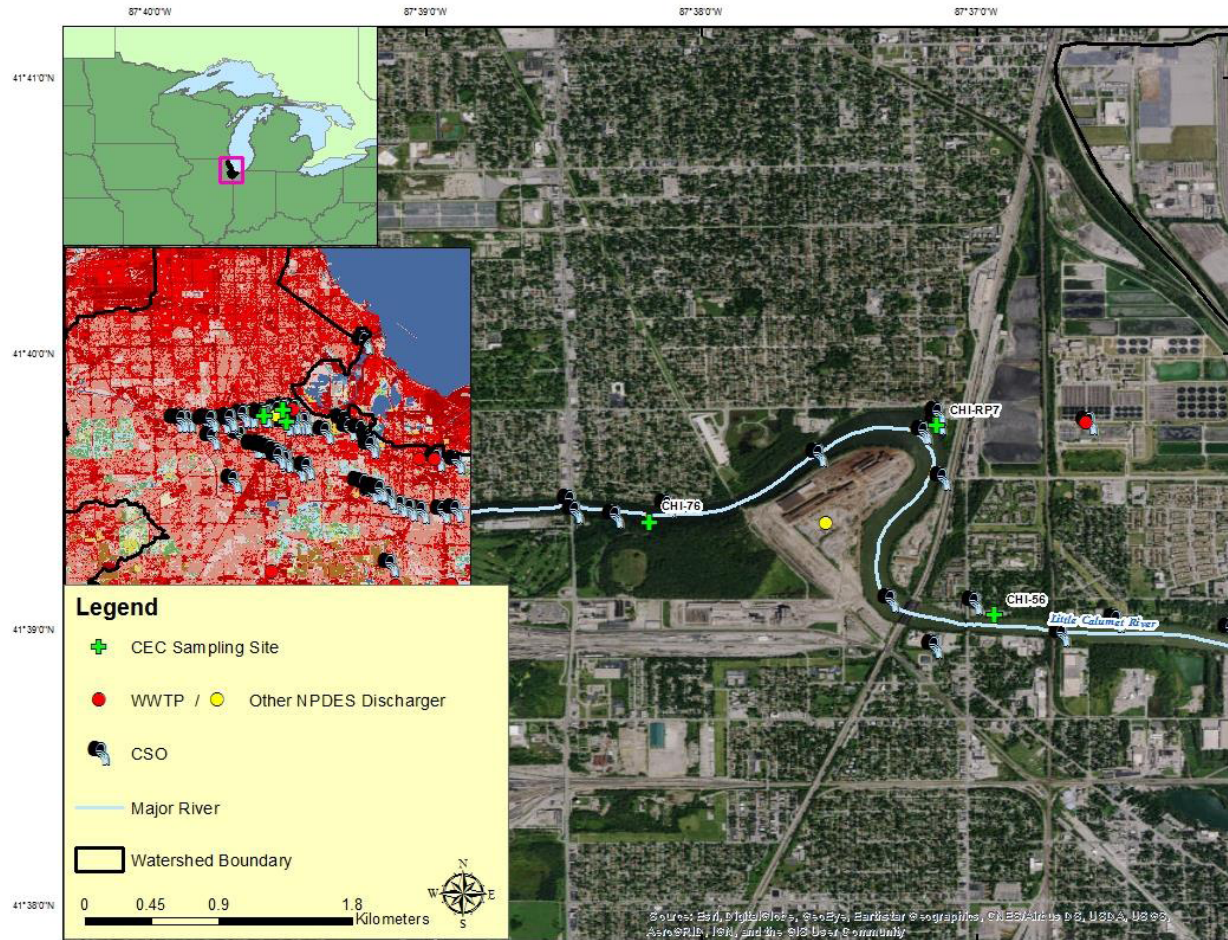

**Fig C.** Map of Little Calumet River sites sampled for contaminants of emerging concern in 2014. River flows west.

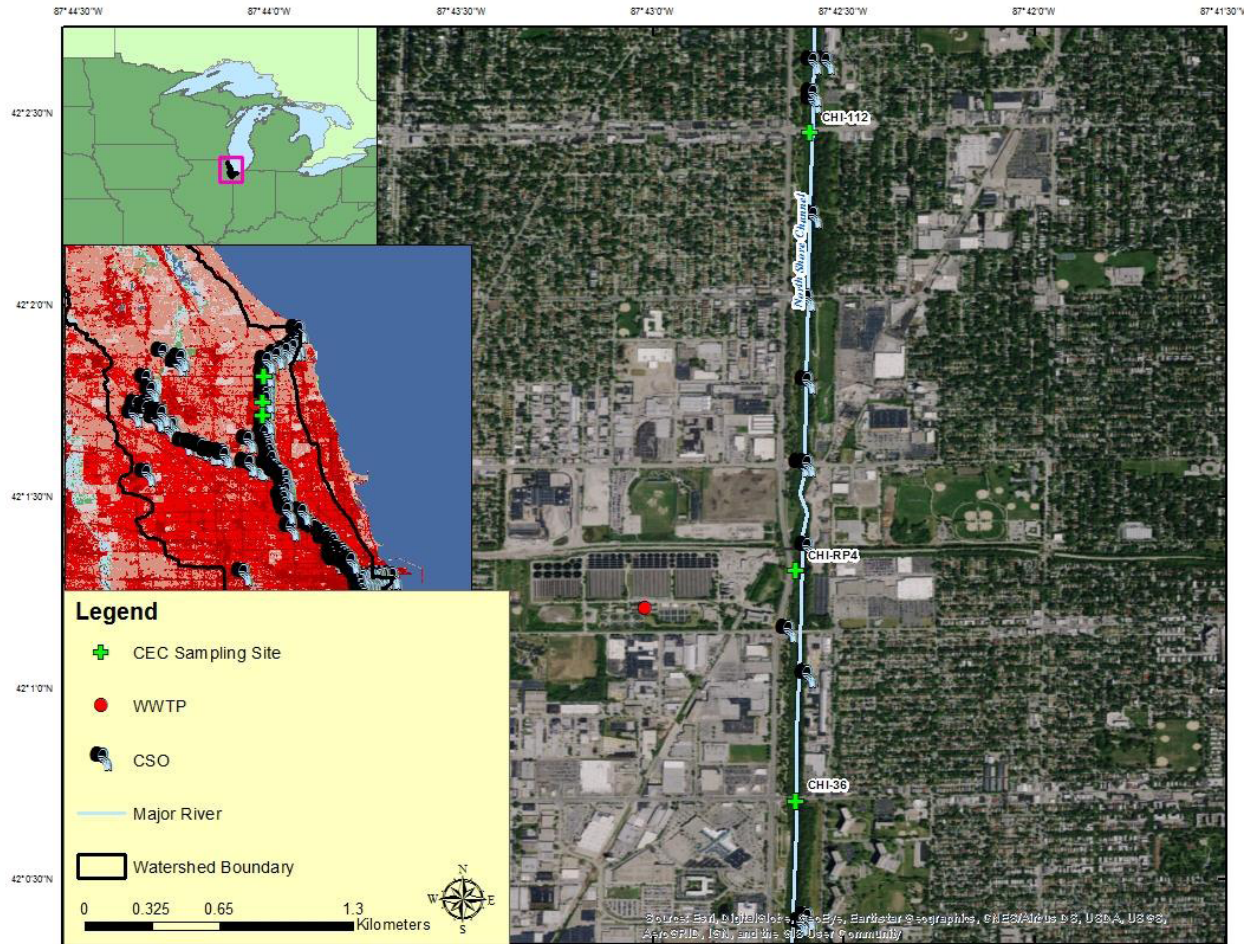

**Fig D.** Map of the North Shore Channel of the Chicago River sites sampled for contaminants of emerging concern in 2014. River flows south.



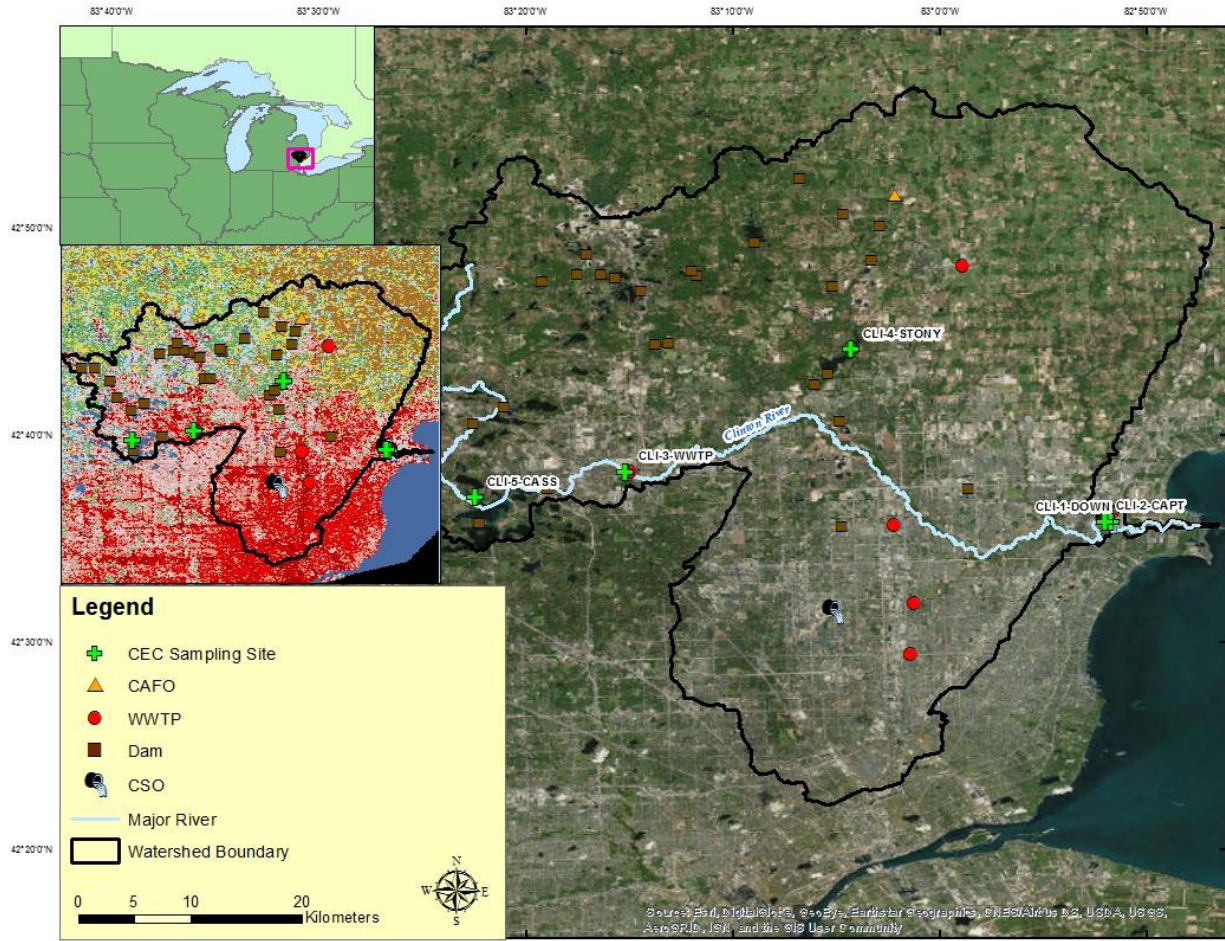

**Fig E.** Map of Clinton River sites sampled for contaminants of emerging concern, 2013-14. River flows east.

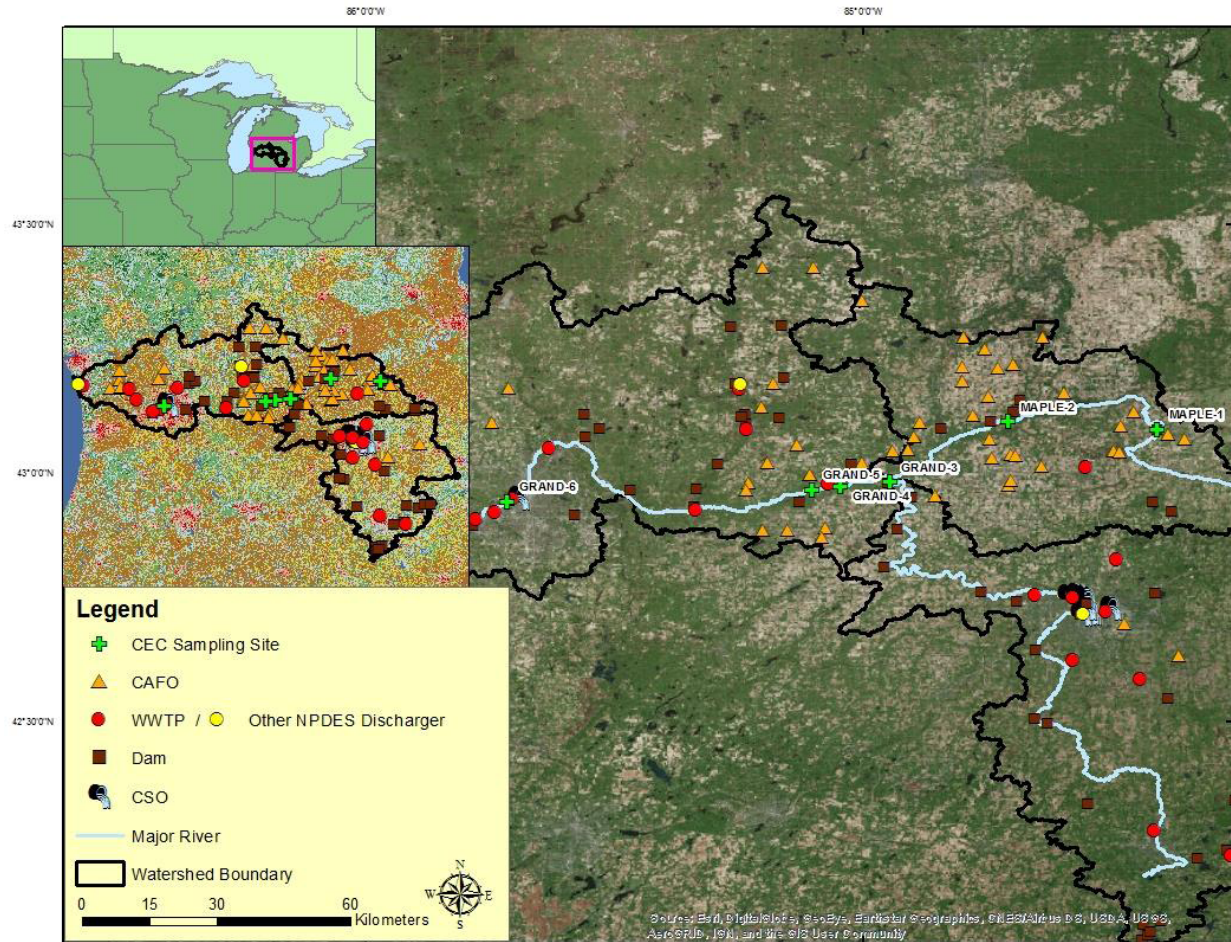

**Fig F.** Map of Grand and Maple River sites sampled for contaminants of emerging concern, 2013-14. Rivers flow west.



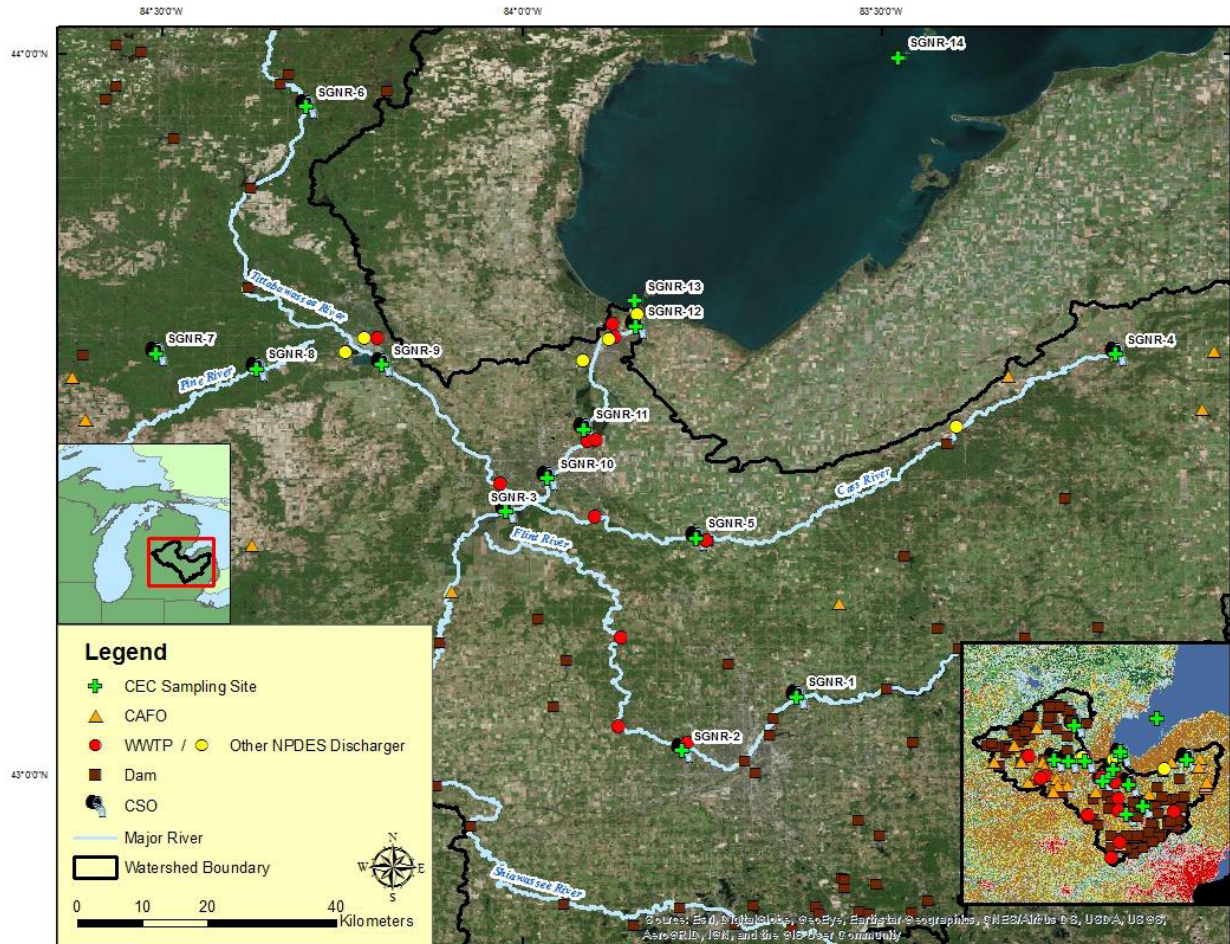

**Fig G.** Map of Saginaw River sites sampled for contaminants of emerging concern in 2013. River flows north.

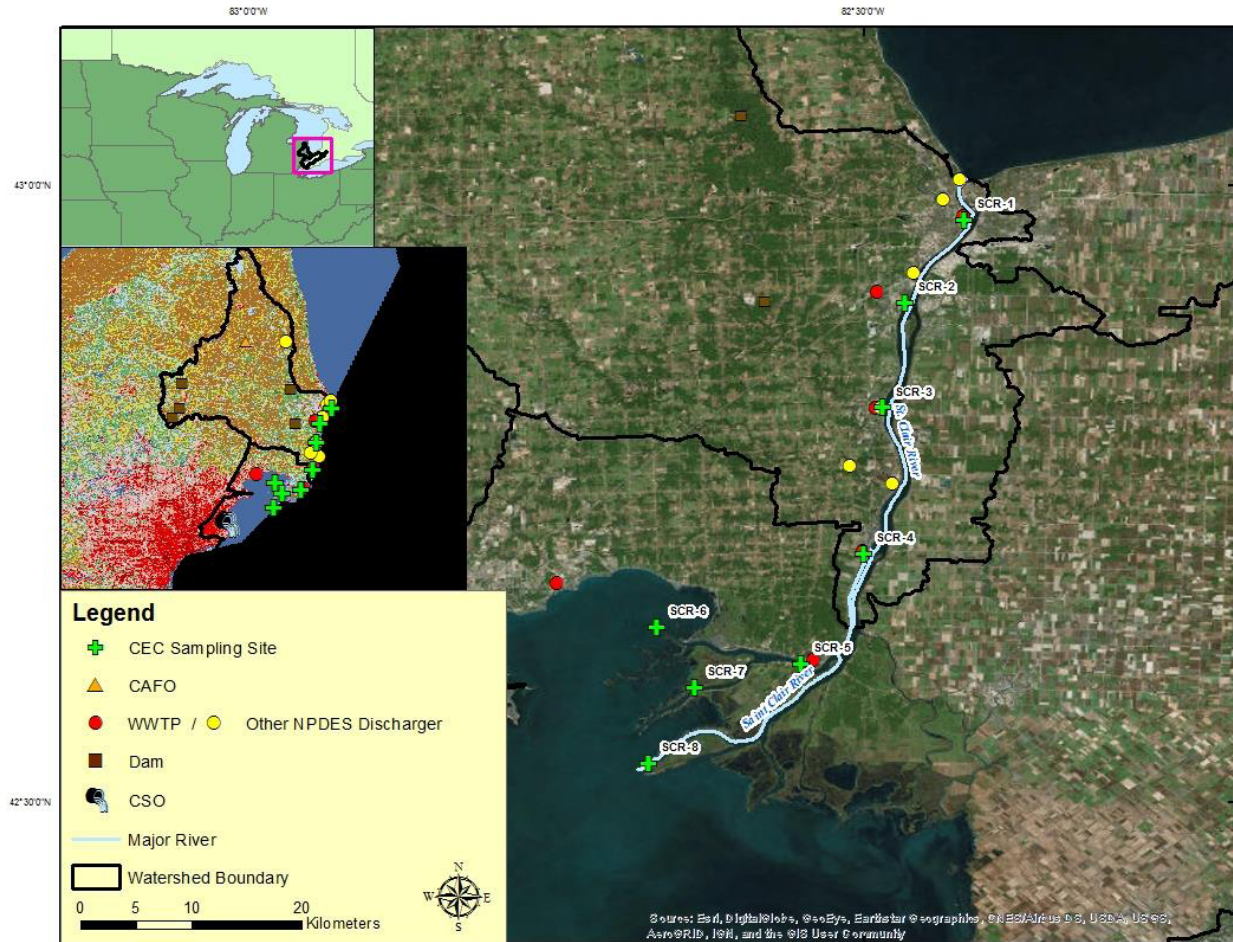

**Fig H.** Map of St. Clair River sites sampled for contaminants of emerging concern in 2013. River flows southwest.



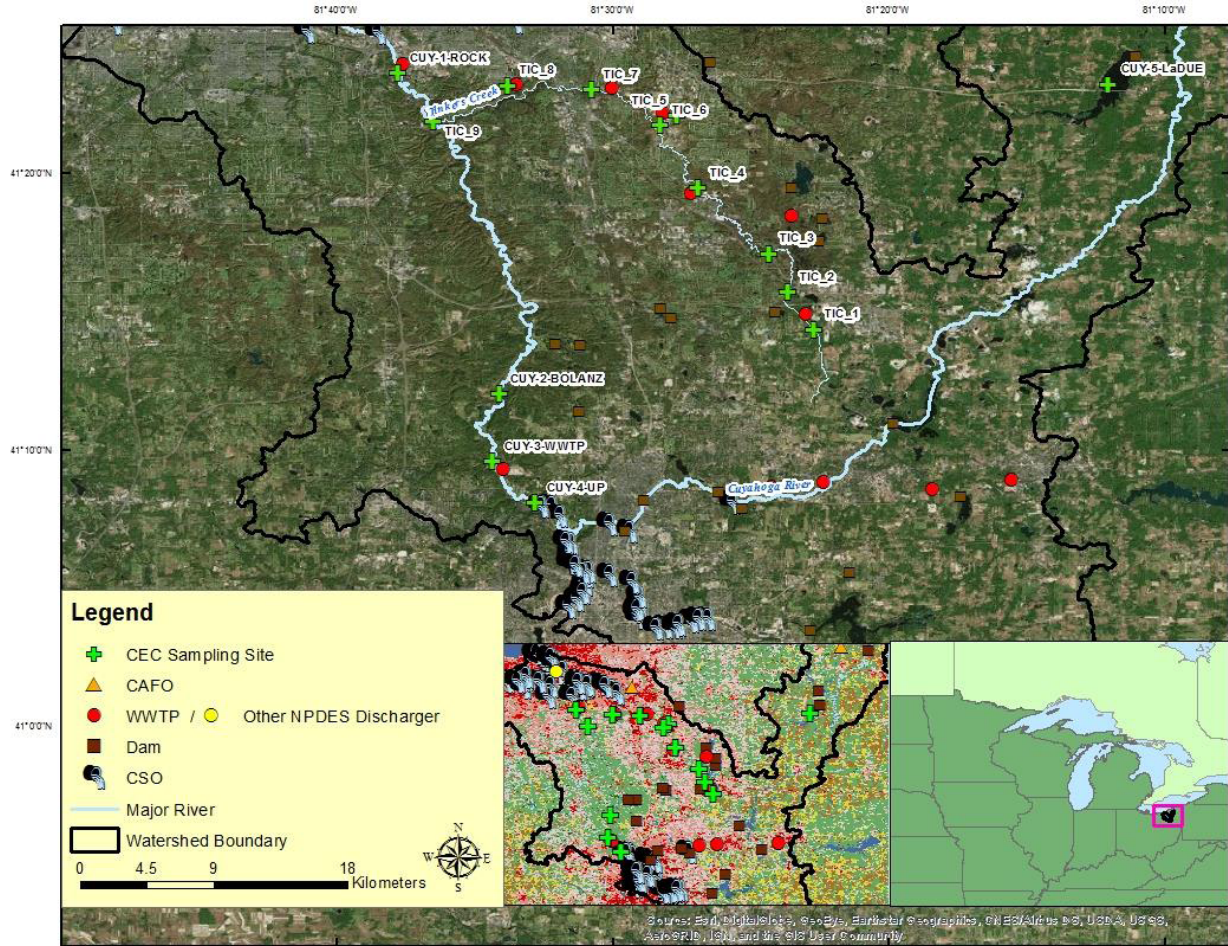

**Fig I.** Map of Tinkers Creek and Cuyahoga River sites sampled for contaminants of emerging concern, 2013-14. Rivers flow north.

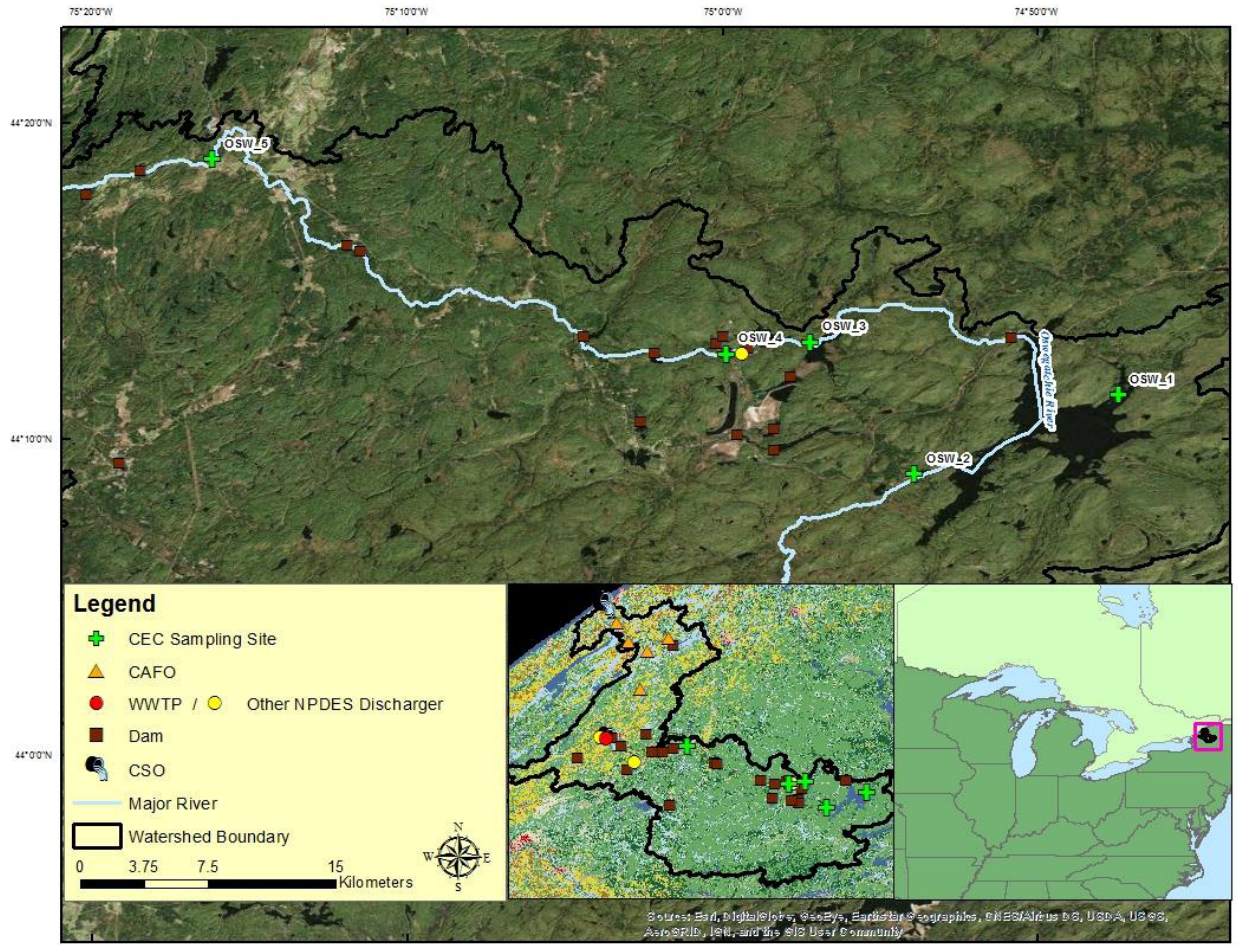

**Fig J.** Map of Oswegatchie River sites sampled for contaminants of emerging concern, 2013-14. River flows northwest.



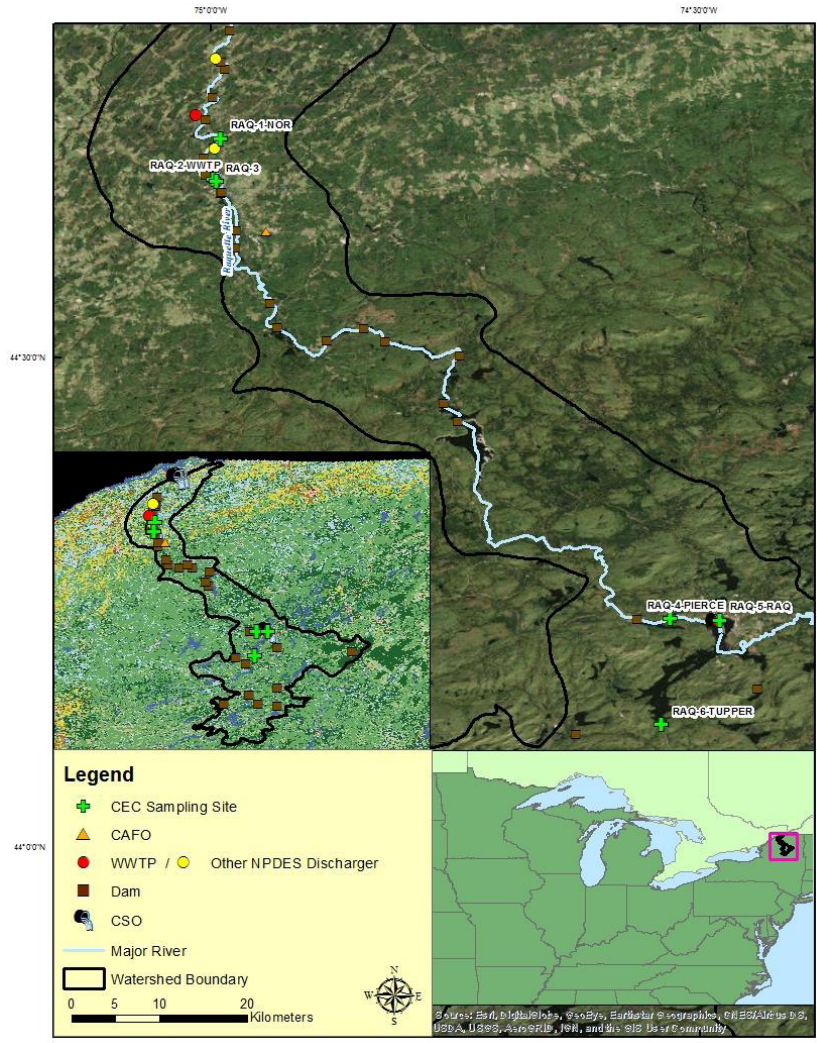

**Fig K.** Map of Raquette River sites sampled for contaminants of emerging concern, 2013-14. River flows northwest.
